# Supplementary material
Source: Springer Nature journal article supplement (https://www.springermedizin.de/resource/supplementary/12874_2006_188_MOESM3_ESM.pdf/9434052)

# HEPARIN (Non-fatal PE)

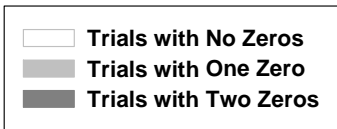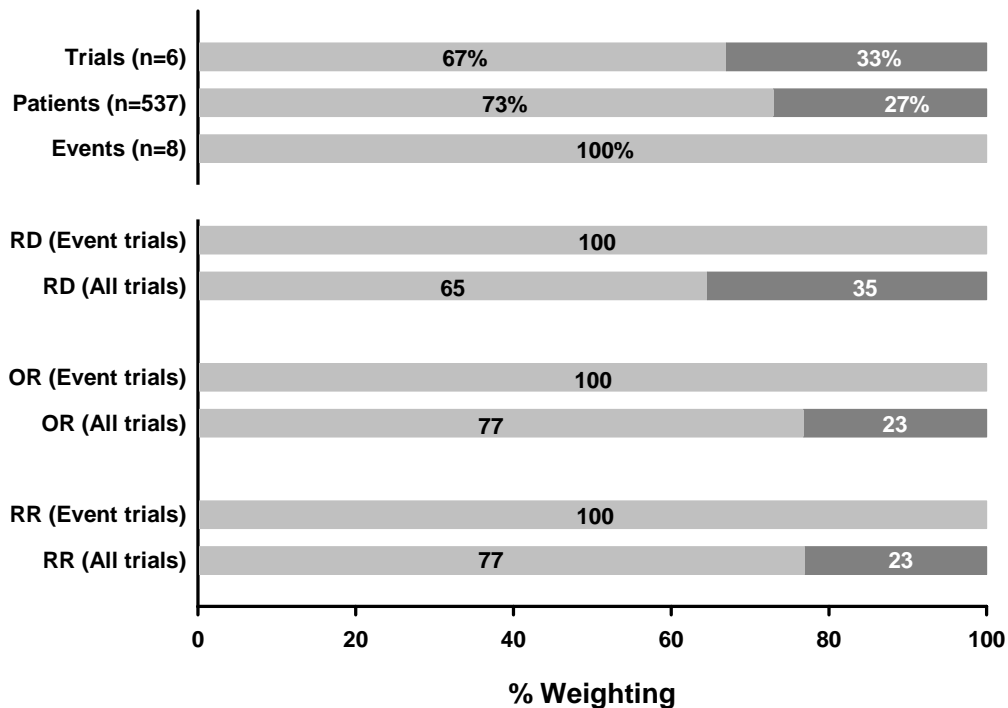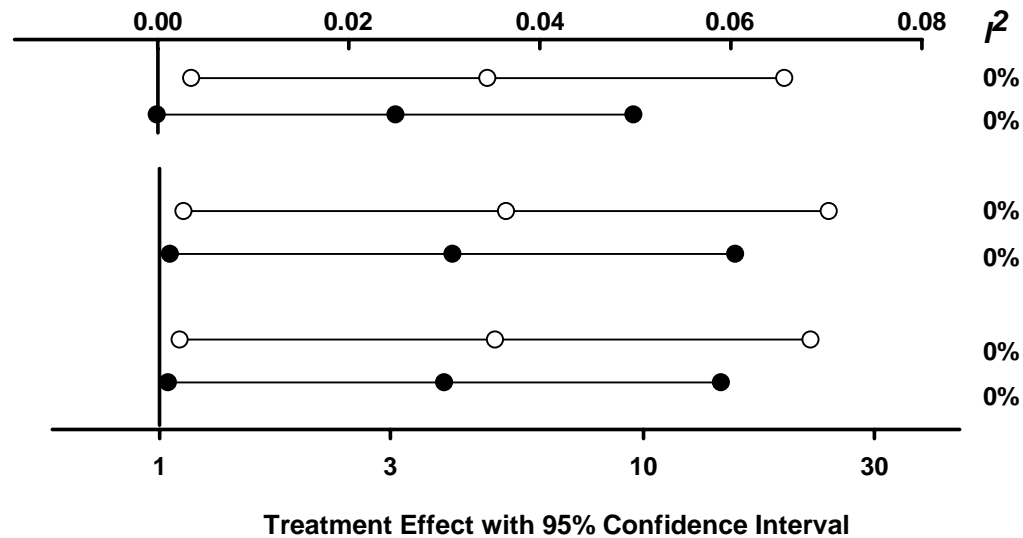

Supplement: MOESM3 [file 9434052]
